# Supplementary material
Source: MDPI journal article supplement (https://www.mdpi.com/search?q=antibiotics-10-00385)
Supplement: s001 [file antibiotics-10-00385-s001.pdf]

## Article

# Finding What Is Inaccessible: Antimicrobial Resistance Language Use among the One Health Domains

Lauren L. Wind <sup>1,\*</sup>, Jonathan S. Briganti <sup>2</sup>, Anne M. Brown <sup>2</sup>, Timothy P. Neher <sup>3</sup>, Meghan F. Davis <sup>4</sup>, Lisa M. Durso <sup>5</sup>, Tanner Spicer <sup>2</sup> and Stephanie Lansing <sup>6</sup>

<sup>1</sup> Department of Biological Systems Engineering, Virginia Tech, Blacksburg, VA 24060, USA; wlauren@vt.edu

<sup>2</sup> University Libraries, Virginia Tech, Blacksburg, VA 24060, USA; jonbrig@vt.edu (J.S.B.); ambrown7@vt.edu (A.M.B.); tanner9@vt.edu (T.M.)

<sup>3</sup> Department of Agricultural and Biosystems Engineering, Iowa State University, Ames, IA 50011, USA; tpneher@iastate.edu

<sup>4</sup> Johns Hopkins Bloomberg School of Public Health, Baltimore, MD 21205, USA; mdavis65@jhu.edu

<sup>5</sup> USDA-ARS, Lincoln, NE 68583, USA; lisa.durso@usda.gov

<sup>6</sup> Department of Environmental Science and Technology, University of Maryland, College Park, MD 20742, USA; slansing@umd.edu

\* Correspondence: wlauren@vt.edu

**Citation:** Wind, L.L.; Briganti, J.S.; Brown, A.M.; Neher, T.P.; Davis, M.F.; Durso, L.M.; Lansing, S. Finding What Is Inaccessible: Antimicrobial Resistance Language Use among the One Health Domains. *Antibiotics* **2021**, *10*, 385. <https://doi.org/10.3390/antibiotics10040385>

Received: 1 March 2021

Accepted: 31 March 2021

Published: 3 April 2021

**Publisher's Note:** MDPI stays neutral with regard to jurisdictional claims in published maps and institutional affiliations.

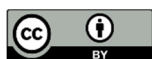

**Copyright:** © 2021 by the authors. Licensee MDPI, Basel, Switzerland. This article is an open access article distributed under the terms and conditions of the Creative Commons Attribution (CC BY) license (<http://creativecommons.org/licenses/by/4.0/>).

**Scheme S1. Text.** The reduced list of the top 25 search terms used for the correlation tests included: agricultural, human, fish, finfish, ecosystem, environmental, ecohealth, drug resistant, drinking water, dairy, cow, compost, chicken, cattle, clinic, bovine, biosolids, beef, aquaculture, ARB, AR, antimicrobial resistance, antibiotic resistant, animal, and AMR.

**Table S1.** Summary Statistics of key terms from 1990 to 2019.

| Search Terms             | Avg. Term Counts | Std. dev. of Term Counts | Avg. Trimmed Term Counts | Std. dev. of Trimmed Term Counts |
|--------------------------|------------------|--------------------------|--------------------------|----------------------------------|
| Agriculture              | 2.8              | 4.1                      | 2.8                      | 1.0                              |
| Amr                      | 9.5              | 22.6                     | 5.4                      | 4.0                              |
| Animal                   | 11.4             | 18.6                     | 8.4                      | 6.7                              |
| Antibiotic Resistance    | 6.9              | 9.7                      | 9.0                      | 10.5                             |
| Antimicrobial Resistance | 6.5              | 8.8                      | 5.7                      | 3.7                              |
| Aquaculture              | 6.5              | 12.9                     | 4.7                      | 3.3                              |
| Ar                       | 230.7            | 237.2                    | 174.3                    | 67.6                             |
| Arb                      | 7.1              | 13.9                     | 9.1                      | 14.9                             |
| Beef                     | 5.2              | 10.1                     | 4.2                      | 2.8                              |
| Biosolids                | 3.9              | 9.2                      | 3.4                      | 1.5                              |
| Bovine                   | 4.8              | 11.8                     | 3.3                      | 1.9                              |
| Cattle                   | 10.9             | 20.8                     | 7.6                      | 6.9                              |
| Chicken                  | 10.3             | 19.3                     | 7.3                      | 6.8                              |
| Clinic                   | 11.2             | 21.6                     | 8.5                      | 5.8                              |
| Compost                  | 7.3              | 21.6                     | 3.9                      | 2.5                              |
| Cow                      | 6.2              | 17.2                     | 3.6                      | 2.0                              |
| Dairy                    | 11.3             | 23.6                     | 7.7                      | 7.0                              |
| Drinking Water           | 4.8              | 8.6                      | 3.8                      | 2.1                              |
| Drug Resistance          | 6.6              | 9.8                      | 5.6                      | 4.0                              |
| Ecohealth                | 4.0              | 7.7                      | 3.2                      | 1.2                              |
| Ecosystem                | 5.7              | 15.9                     | 4.0                      | 2.2                              |
| Environment              | 8.3              | 13.4                     | 6.3                      | 4.6                              |
| Finfish                  | 2.5              | 2.1                      | 2.3                      | 0.5                              |
| Fish                     | 6.0              | 16.7                     | 3.7                      | 2.1                              |
| Groundwater              | 4.7              | 10.2                     | 3.8                      | 2.0                              |
| Human                    | 14.4             | 20.7                     | 10.5                     | 8.1                              |
| Manure                   | 7.9              | 21.3                     | 4.5                      | 3.5                              |
| Mdr                      | 13.5             | 21.6                     | 7.4                      | 5.3                              |
| Multidrug Resistance     | 3.9              | 5.9                      | 5.2                      | 4.1                              |
| One Health               | 11.2             | 26.3                     | 6.9                      | 5.9                              |
| One Medicine             | 2.0              | 3.6                      | 3.9                      | 2.7                              |
| Patient                  | 24.4             | 71.7                     | 16.7                     | 16.2                             |
| Pharmaceutical           | 3.4              | 7.2                      | 2.8                      | 1.0                              |
| Pig                      | 9.8              | 23.1                     | 5.5                      | 4.6                              |
| Porcine                  | 6.7              | 12.1                     | 5.6                      | 4.3                              |
| Poultry                  | 8.0              | 14.6                     | 5.9                      | 4.6                              |
| Resistance               | 18.3             | 29.6                     | 13.0                     | 12.5                             |
| Shellfish                | 4.2              | 11.7                     | 2.8                      | 1.0                              |
| Soil                     | 17.6             | 43.5                     | 9.4                      | 10.1                             |
| Surface Water            | 3.9              | 7.0                      | 3.4                      | 1.6                              |
| Swine                    | 6.1              | 14.7                     | 4.2                      | 2.6                              |
| Turkey                   | 4.3              | 9.4                      | 3.2                      | 1.4                              |
| Wastewater               | 10.6             | 22.7                     | 7.1                      | 5.8                              |
| Wastewater Treatment     | 4.8              | 7.4                      | 4.2                      | 2.4                              |

**Table S2.** One Health Top Journals articles were returned from Europe PMC search queries.

| Journal                               | Count |
|---------------------------------------|-------|
| 'PLOS One'                            | 1188  |
| 'Frontiers in Microbiology'           | 1012  |
| 'One Health (Amsterdam, Netherlands)' | 880   |
| 'Frontiers in Veterinary Science'     | 748   |
| 'Frontiers in Public Health'          | 704   |
| 'BMC Public Health'                   | 704   |
| 'Infection Ecology & Epidemiology'    | 660   |
| 'Malaria Journal'                     | 484   |
| 'Veterinary Sciences'                 | 440   |
| 'BMC Veterinary Research'             | 396   |

**Table S3.** Animal Top Journals articles were returned from Europe PMC search queries.

| Journal                                | Count  |
|----------------------------------------|--------|
| 'PLOS One'                             | 23,760 |
| 'British Journal of Cancer'            | 7832   |
| 'Frontiers in Microbiology'            | 6820   |
| 'Environmental Health Perspectives'    | 5500   |
| 'The Journal of Cell Biology'          | 5412   |
| 'Emerging Infectious Diseases'         | 4356   |
| 'Scientific Reports'                   | 4004   |
| 'The Journal of Experimental Medicine' | 3388   |
| 'BMC Genomics'                         | 2948   |
| 'The Journal of General Physiology'    | 2288   |

**Table S4.** Environment Top Journals articles were returned from Europe PMC search queries.

| Journal                                | Count  |
|----------------------------------------|--------|
| 'PLOS one'                             | 24,420 |
| 'Frontiers in Microbiology'            | 8536   |
| 'Environmental Health Perspectives'    | 7260   |
| 'Scientific Reports'                   | 5324   |
| 'Emerging Infectious Diseases'         | 4620   |
| 'The Journal of Experimental Medicine' | 4092   |

|                                                                     |      |
|---------------------------------------------------------------------|------|
| 'International Journal of Environmental Research and Public Health' | 3828 |
| 'BMC Microbiology'                                                  | 3652 |
| 'British Journal of Cancer'                                         | 3564 |
| 'The Journal of Cell Biology'                                       | 3520 |

**Table S5.** Human Top Journals articles were returned from Europe PMC search queries.

| <b>Journal</b>                         | <b>Count</b> |
|----------------------------------------|--------------|
| 'PLOS One'                             | 16,984       |
| 'British Journal of Cancer'            | 12,980       |
| 'The Journal of Experimental Medicine' | 4708         |
| 'Emerging Infectious Diseases'         | 3960         |
| 'Environmental Health Perspectives'    | 2816         |
| 'BMC Infectious Diseases'              | 2552         |
| 'Malaria Journal'                      | 2244         |
| 'The Journal of Cell Biology'          | 2068         |
| 'BMC Cancer'                           | 2024         |
| 'Critical Care (London, England)'      | 1804         |

**Table S6.** Overlapping Top-Ten Journals returned from Europe PMC search queries.

| <b>Journal</b>                       | <b>Human</b> | <b>Animal</b> | <b>Environment</b> | <b>One Health</b> |
|--------------------------------------|--------------|---------------|--------------------|-------------------|
| British Journal of Cancer            | X            | X             | X                  |                   |
| Emerging Infectious Diseases         | X            | X             | X                  |                   |
| Environmental Health Perspectives    | X            | X             | X                  |                   |
| Frontiers in Microbiology            |              | X             | X                  | X                 |
| Malaria Journal                      | X            |               |                    | X                 |
| PLOS One                             | X            | X             | X                  | X                 |
| Scientific Reports                   |              | X             | X                  |                   |
| The Journal of Cell Biology          | X            | X             | X                  |                   |
| The Journal of Experimental Medicine | X            | X             | X                  |                   |

**Table S7.** Top 10 words in the One Health domain binned articles.

| Top Terms | Human      | Sum Term  | Animal     | Sum Term | Environment | Sum Term |
|-----------|------------|-----------|------------|----------|-------------|----------|
| 1         | cell       | 1,680,634 | cell       | 229,814  | cell        | 137,997  |
| 2         | patient    | 1,290,369 | gene       | 103,338  | gene        | 103,938  |
| 3         | study      | 892,768   | study      | 89,882   | study       | 85,022   |
| 4         | cancer     | 726,779   | protein    | 78,061   | resistance  | 75,139   |
| 5         | treatment  | 559,664   | human      | 66,467   | protein     | 60,005   |
| 6         | gene       | 547,230   | resistance | 62,872   | strain      | 53,207   |
| 7         | human      | 458,294   | expression | 58,888   | data        | 47,785   |
| 8         | protein    | 446,148   | cancer     | 51,251   | plant       | 45,789   |
| 9         | expression | 427,157   | patient    | 46,105   | water       | 43,826   |
| 10        | disease    | 424,081   | level      | 44,845   | treatment   | 42,533   |

**Table S8.** Top 10 words in the One Health domain binned articles.

| Top Terms | Human      | Sum Term  | Animal     | Sum Term | Environment | Sum Term |
|-----------|------------|-----------|------------|----------|-------------|----------|
| 1         | cell       | 1,680,634 | cell       | 229,814  | cell        | 137,997  |
| 2         | patient    | 1,290,369 | gene       | 103,338  | gene        | 103,938  |
| 3         | study      | 892,768   | study      | 89,882   | study       | 85,022   |
| 4         | cancer     | 726,779   | protein    | 78,061   | resistance  | 75,139   |
| 5         | treatment  | 559,664   | human      | 66,467   | protein     | 60,005   |
| 6         | gene       | 547,230   | resistance | 62,872   | strain      | 53,207   |
| 7         | human      | 458,294   | expression | 58,888   | data        | 47,785   |
| 8         | protein    | 446,148   | cancer     | 51,251   | plant       | 45,789   |
| 9         | expression | 427,157   | patient    | 46,105   | water       | 43,826   |
| 10        | disease    | 424,081   | level      | 44,845   | treatment   | 42,533   |

Resistance Key Terms (Subset from *Journal of Dairy Science*)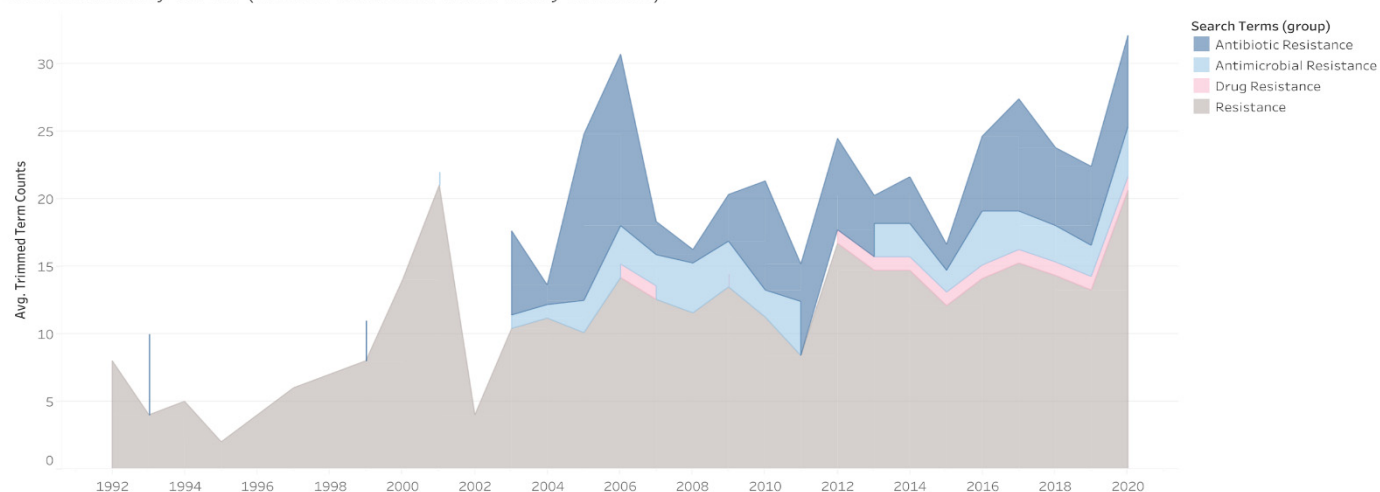

**Figure S1.** The average trimmed frequency counts of resistance-related search terms each year used per article in the *Journal of Dairy Science*. Trimmed search term counts, top and bottom 10%, were removed as assumed outliers.

```
node --max_old_space_size=4000 $(which getpapers) -q '(((TITLE:"human" OR
"patient" OR "pharmaceutical" OR "clinic*") AND (TITLE:"Antimicrobial
resistance" OR "antibiotic resistance" OR "drug resistance" OR "multi-drug
resistance" OR "resistance" OR "AMR" OR "ARB" OR "AR" OR "MDR") NOT
(TITLE:"herbicide" OR "pesticide" OR "disease resistance" OR "fungicide")) OR
((ABSTRACT:"human" OR "patient" OR "pharmaceutical" OR "clinic*") AND
(ABSTRACT:"Antimicrobial resistance" OR "antibiotic resistance" OR "drug
resistance" OR "multi-drug resistance" OR "resistance" OR "AMR" OR "ARB" OR
"AR" OR "MDR") NOT (ABSTRACT:"herbicide" OR "pesticide" OR "disease resistance"
OR "fungicide")))) AND (FIRST_PDate:[1990-01-01 TO 1990-12-31] AND HAS_PDF:y) '
-o HumanAmsContainer -p -f AmsContentMineHumanLog -k 2000
```

**Figure S2.** Example of search query used within bin terms in ContentMine.

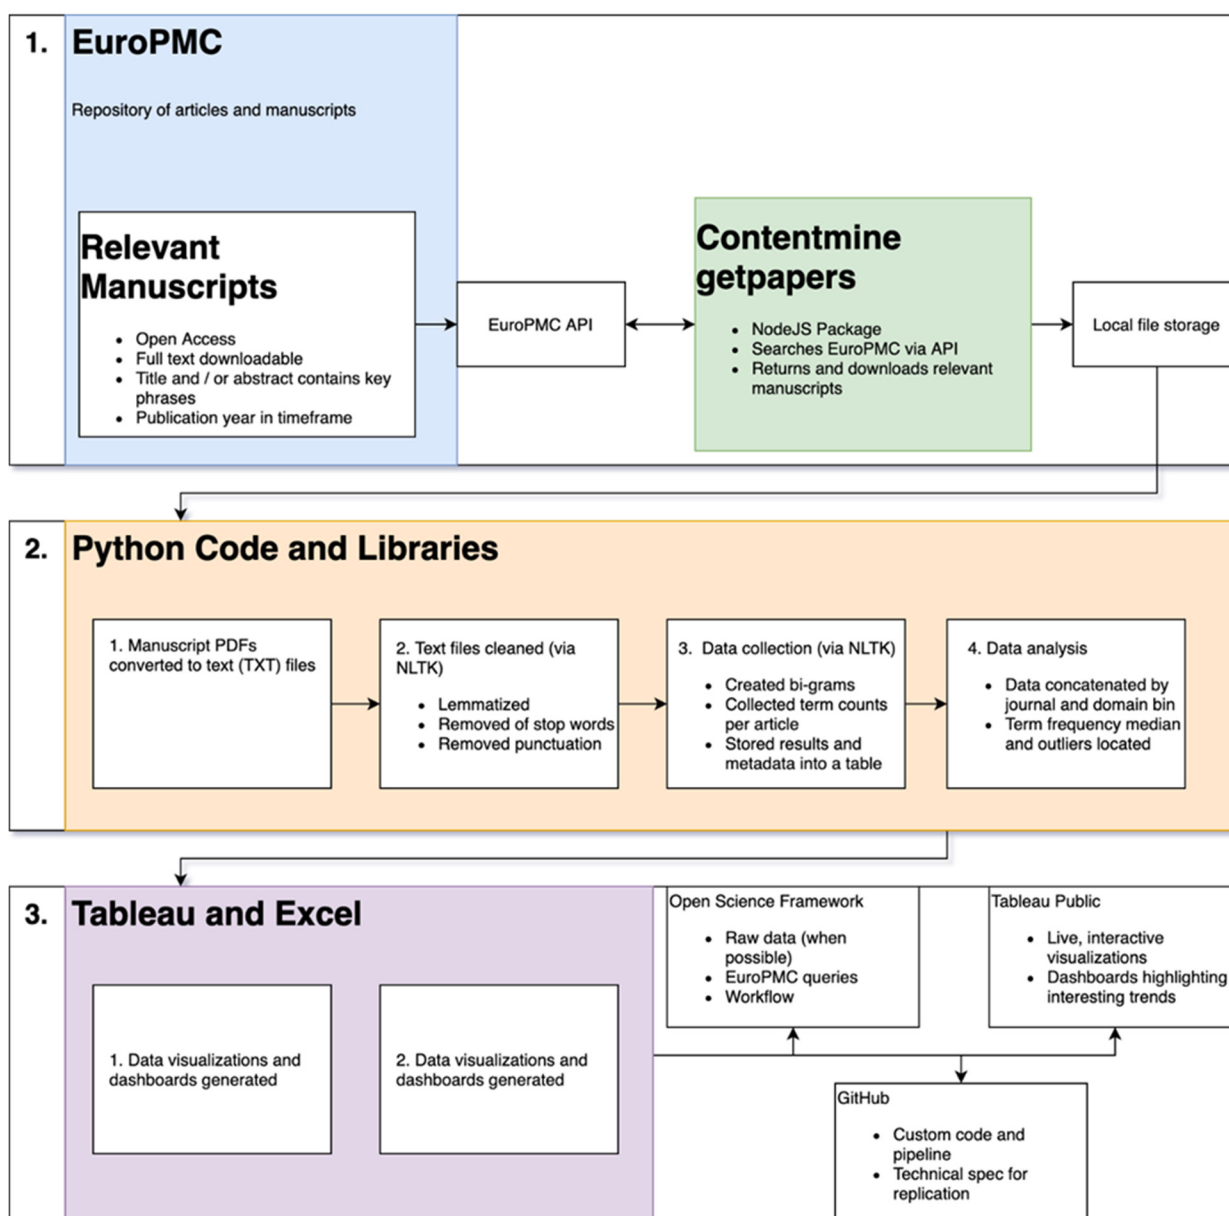

**Figure S3.** Workflow of the data collection, processing, and visualization details pertaining to this study.
